## Expression of Concern

# Expression of Concern: microRNA-1298 inhibits the malignant behaviors of breast cancer cells via targeting ADAM9

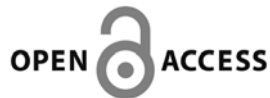

The Editorial Office has been made aware of potential issues surrounding the scientific validity of this paper, hence has issued an expression of concern to notify readers whilst the Editorial Office investigates.

Downloaded from [http://port.silverchair.com/bioscierep/article-pdf/41/4/BSR-20201215\\_EOC/907006/bsr-2020-1215-eoc.pdf](http://port.silverchair.com/bioscierep/article-pdf/41/4/BSR-20201215_EOC/907006/bsr-2020-1215-eoc.pdf) by guest on 09 April 2024

Version of Record published:  
09 April 2021
